# Supplementary material
Source: Springer Nature journal article supplement (https://www.springermedizin.de/resource/supplementary/13561_2012_60_MOESM10_ESM.docx/9687336)

Figure 4: Effect of risk of RSV hospitalisation on cost-effectiveness for preterm infants 33-35 wGA


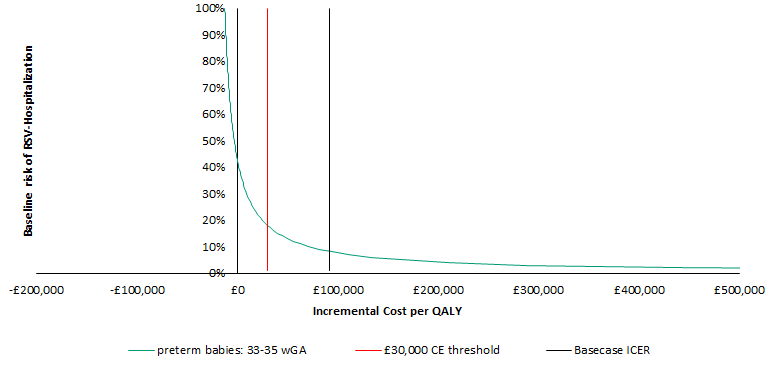

Supplement: MOESM10 [file 9687336]
